# Supplementary material
Source: PubMed Central journal article supplement (PMC6237646)
Supplement: NIHMS1506480-supplement-Supplemental_Material.pdf [file NIHMS1506480-supplement-Supplemental_Material.pdf]

## Sample Size and Statistics

### Figure 1b – i

Analysis – (1b, 1i): Average speed calculated over the 10 min. testing period. (1d): Average bout length calculated over the 10 min. testing period. (1e): Average pause length calculated over the 10 min. testing period. (1f): Number of bouts over 10 min. testing period. (1g): Daily crossings sampled every min. per day. (1h): Stance linearity index, see ref. 64 for calculations

All are biological replicates assessed with a two-tailed test and data are representative of at least 3 independent trials for each experiment.

| Figure | Condition  | # | Sample Size | Statistical Test                        | Comparison | P-value    |
|--------|------------|---|-------------|-----------------------------------------|------------|------------|
| 1b     | Conv       | 1 | 36          | Kruskal-Wallis test<br>( $P < 0.0001$ ) | 1 v 2      | 0.0070     |
|        | Ax         | 2 | 36          |                                         | 1 v 3      | 0.0024     |
|        | <i>L.p</i> | 3 | 35          |                                         | 1 v 4      | 0.9999     |
|        | <i>L.b</i> | 4 | 36          |                                         | 2 v 3      | 0.9999     |
|        |            |   |             |                                         | 2 v 4      | 0.0112     |
|        |            |   | 3 v 4       | 0.0040                                  |            |            |
| 1d     | Conv       | 1 | 32          | Kruskal-Wallis test<br>( $P = 0.0026$ ) | 1 v 2      | 0.0014     |
|        | Ax         | 2 | 36          |                                         | 1 v 3      | 0.2111     |
|        | <i>L.p</i> | 3 | 22          |                                         | 1 v 4      | 0.9999     |
|        | <i>L.b</i> | 4 | 20          |                                         | 2 v 3      | 0.9999     |
|        |            |   |             |                                         | 2 v 4      | 0.2814     |
|        |            |   | 3 v 4       | 0.9999                                  |            |            |
| 1e     | Conv       | 1 | 32          | Kruskal-Wallis test<br>( $P < 0.0001$ ) | 1 v 2      | $< 0.0001$ |
|        | Ax         | 2 | 36          |                                         | 1 v 3      | 0.0034     |
|        | <i>L.p</i> | 3 | 22          |                                         | 1 v 4      | 0.9999     |
|        | <i>L.b</i> | 4 | 20          |                                         | 2 v 3      | 0.9999     |
|        |            |   |             |                                         | 2 v 4      | 0.0335     |
|        |            |   | 3 v 4       | 0.3321                                  |            |            |
| 1f     | Conv       | 1 | 32          | Kruskal-Wallis test<br>( $P = 0.6685$ ) |            |            |
|        | Ax         | 2 | 36          |                                         |            |            |
|        | <i>L.p</i> | 3 | 22          |                                         |            |            |
|        | <i>L.b</i> | 4 | 20          |                                         |            |            |
| 1g     | Conv       | 1 | 8           | Kruskal-Wallis test<br>( $P = 0.0042$ ) | 1 v 2      | 0.0100     |
|        | Ax         | 2 | 8           |                                         | 1 v 3      | 0.1980     |
|        | <i>L.p</i> | 3 | 8           |                                         | 1 v 4      | 0.9999     |
|        | <i>L.b</i> | 4 | 8           |                                         | 2 v 3      | 0.9999     |
|        |            |   |             |                                         | 2 v 4      | 0.0335     |
|        |            |   | 3 v 4       | 0.4716                                  |            |            |
| 1h     | Conv       | 1 | 6           | Kruskal-Wallis test<br>( $P = 0.0057$ ) | 1 v 2      | 0.0063     |
|        | Ax         | 2 | 7           |                                         | 1 v 3      | 0.8248     |
|        | <i>L.p</i> | 3 | 5           |                                         | 1 v 4      | 0.9999     |
|        | <i>L.b</i> | 4 | 5           |                                         | 2 v 3      | 0.6907     |
|        |            |   |             |                                         | 2 v 4      | 0.0508     |
|        |            |   | 3 v 4       | 0.9999                                  |            |            |

| Figure | Condition  | # | Sample Size | Statistical Test                    | Comparison | P-value |
|--------|------------|---|-------------|-------------------------------------|------------|---------|
| 1i     | Conv       | 1 | 25          | Kruskal-Wallis test<br>(P = 0.0016) | 1 v 2      | 0.2846  |
|        | Ax         | 2 | 29          |                                     | 1 v 3      | 0.0470  |
|        | <i>L.p</i> | 3 | 24          |                                     | 1 v 4      | 0.9999  |
|        | <i>L.b</i> | 4 | 35          |                                     | 2 v 3      | 0.9999  |
|        |            |   |             |                                     | 2 v 4      | 0.0453  |
|        |            |   |             |                                     | 3 v 4      | 0.0047  |

### Figure 2a – f

Analysis – (2a – d, 2f): Average speed. (2e): Carbohydrate analysis of whole fly homogenates measured using HPAEC-PAD. Each sample contains 5 flies.

All are biological replicates assessed with a two-tailed test and data are representative of at least 2 independent trials for each experiment, except for Figure 2e in which one trial was performed.

| Figure | Condition                   | Measurement | #     | Sample Size | Statistical Test                    | Comparison | P-value  |
|--------|-----------------------------|-------------|-------|-------------|-------------------------------------|------------|----------|
| 2a     | Ax                          |             | 1     | 57          | Kruskal-Wallis test<br>(P = 0.0004) | 1 v 2      | 0.0004   |
|        | <i>L.b</i>                  |             | 2     | 42          |                                     | 1 v 3      | 0.0294   |
|        | <i>L.b</i> CFS              |             | 3     | 36          |                                     | 1 v 4      | 0.9999   |
|        | <i>L.b</i> HK               |             | 4     | 24          |                                     | 2 v 3      | 0.9999   |
|        |                             |             |       |             |                                     | 2 v 4      | 0.1188   |
|        |                             |             | 3 v 4 | 0.8799      |                                     |            |          |
| 2b     | Conv                        |             | 1     | 17          | Kruskal-Wallis test<br>(P < 0.0001) | 1 v 2      | < 0.0001 |
|        | Ax                          |             | 2     | 45          |                                     | 1 v 3      | 0.9999   |
|        | Xi*                         |             | 3     | 29          |                                     | 2 v 3      | < 0.0001 |
| 2c     | Ax                          |             | 1     | 31          | Kruskal-Wallis test<br>(P = 0.0014) | 1 v 2      | 0.0253   |
|        | <i>L.b</i> CFS              |             | 2     | 12          |                                     | 1 v 3      | 0.0048   |
|        | Xi*                         |             | 3     | 28          |                                     | 1 v 4      | 0.9999   |
|        | Ai*                         |             | 4     | 13          |                                     | 2 v 3      | 0.9999   |
|        |                             |             |       |             |                                     | 2 v 4      | 0.2720   |
|        |                             |             | 3 v 4 | 0.2177      |                                     |            |          |
| 2d     | Ax                          |             | 1     | 28          | Kruskal-Wallis test<br>(P = 0.0003) | 1 v 2      | 0.0002   |
|        | <i>L.b</i>                  |             | 2     | 29          |                                     | 1 v 3      | 0.9056   |
|        | <i>L.b</i> <sup>AxyIA</sup> |             | 3     | 18          |                                     | 2 v 3      | 0.0424   |
| 2e     | Ax                          | Total       |       | 5           | Mann-Whitney test                   |            | 0.0079   |
|        | Xi*                         |             |       |             |                                     |            |          |
|        | Ax                          | Gluc        |       | 5           | Mann-Whitney test                   |            | 0.5000   |
|        | Xi*                         |             |       |             |                                     |            |          |
|        | Ax                          | Fruc        |       | 5           | Mann-Whitney test                   |            | 0.2222   |
|        | Xi*                         |             |       |             |                                     |            |          |
|        | Ax                          | Ribo        |       | 5           | Mann-Whitney test                   |            | 0.0079   |
|        | Xi*                         |             |       |             |                                     |            |          |
|        | Ax                          | Treh        |       | 5           | Mann-Whitney test                   |            | 0.0079   |
|        | Xi*                         |             |       |             |                                     |            |          |

| Figure | Condition | # | Sample Size | Statistical Test                    | Comparison | P-value |
|--------|-----------|---|-------------|-------------------------------------|------------|---------|
| 2f     | Ax        | 1 | 16          | Kruskal-Wallis test<br>(P = 0.0057) | 1 v 2      | 0.0465  |
|        | Xi*       | 2 | 18          |                                     | 1 v 3      | 0.8352  |
|        | Ax+Treh   | 3 | 16          |                                     | 1 v 4      | 0.9999  |
|        | Xi*+Treh  | 4 | 17          |                                     | 2 v 3      | 0.9999  |
|        |           |   |             |                                     | 2 v 4      | 0.0090  |
|        |           |   |             |                                     | 3 v 4      | 0.3024  |

### Figure 3a – g

Analysis – (3a): Difference in average speed between flies calculated for each GAL4 line crossed with *UAS-dTRPA1* tested at 27°C. Each point represents an independent trial, containing between 10 - 15 flies per group. *Tdc2/Ddc/Th/ChAT*, n = 5; *Tβh*, n = 6; *Gad1*, n = 3. For further details and graphs of each GAL4 line, see Extended Data Fig. 8. (3b – g): Average speed. For 3b and c, statistical significance was found for both variables (microbial status x genotype) calculated by Two-way ANOVA. In 3c, there is a significant interaction between microbial status and genotype (P = 0.0437). When examined separately, the Kruskal-Wallis test on only Conv flies across genotypes was significant (P = 0.0030) and the Kruskal-Wallis test on only ABX flies was not significant (P = 0.8426). All are biological replicates assessed with a two-tailed test and data are representative of at least 2 independent trials for each experiment.

| Figure | Condition                    | Genotype                     | Sample Size       | Statistical Test  | P-value |
|--------|------------------------------|------------------------------|-------------------|-------------------|---------|
| 3b     | ABX                          | <i>UAS-TrpA1</i>             | 15                | Mann-Whitney test | 0.0139  |
|        | Xi*                          |                              | 12                |                   |         |
|        | ABX                          | <i>Tdc2-GAL4</i>             | 23                | Mann-Whitney test | 0.0177  |
|        | Xi*                          |                              | 23                |                   |         |
|        | ABX                          | <i>GAL4&gt;UAS</i><br>(27°C) | 14                | Mann-Whitney test | 0.6308  |
|        | Xi*                          |                              | 12                |                   |         |
| ABX    | <i>GAL4&gt;UAS</i><br>(20°C) | 12                           | Mann-Whitney test | 0.0238            |         |
| Xi*    |                              | 15                           |                   |                   |         |
| 3c     | Conv                         | <i>UAS-TrpA1</i>             | 45                | Mann-Whitney test | 0.0033  |
|        | ABX                          |                              | 30                |                   |         |
|        | Conv                         | <i>Tdc2-GAL4</i>             | 48                | Mann-Whitney test | 0.0263  |
|        | ABX                          |                              | 39                |                   |         |
|        | Conv                         | <i>GAL4&gt;UAS</i><br>(27°C) | 49                | Mann-Whitney test | 0.4929  |
|        | ABX                          |                              | 39                |                   |         |
|        | Conv                         | <i>GAL4&gt;UAS</i><br>(20°C) | 22                | Mann-Whitney test | 0.0143  |
|        | ABX                          |                              | 31                |                   |         |

| Figure | Condition | # | Sample Size | Statistical Test                    | Comparison | P-value |
|--------|-----------|---|-------------|-------------------------------------|------------|---------|
| 3d     | Conv      | 1 | 13          | Kruskal-Wallis test<br>(P < 0.0001) | 1 v 2      | 0.0008  |
|        | Ax        | 2 | 33          |                                     | 1 v 3      | 0.9999  |
|        | Xi*       | 3 | 21          |                                     | 2 v 3      | 0.0015  |
|        | Conv+OA   | 4 | 29          |                                     | 4 v 5      | 0.9999  |
|        | Ax+OA     | 5 | 27          |                                     | 4 v 6      | 0.9999  |
|        | Xi*+OA    | 6 | 32          |                                     | 5 v 6      | 0.9999  |

| Figure | Condition | # | Sample Size | Statistical Test                    | Comparison | P-value |
|--------|-----------|---|-------------|-------------------------------------|------------|---------|
| 3e     | Ax        | 1 | 58          | Kruskal-Wallis test<br>(P = 0.0008) | 1 v 2      | 0.9999  |
|        | Ax+OA     | 2 | 13          |                                     | 1 v 3      | 0.9999  |
|        | Ax+TA     | 3 | 10          |                                     | 1 v 4      | 0.0047  |
|        | Xi*       | 4 | 54          |                                     | 1 v 5      | 0.9999  |
|        | Xi*+OA    | 5 | 46          |                                     | 1 v 6      | 0.0351  |
|        | Xi*+TA    | 6 | 27          |                                     | 4 v 5      | 0.0980  |
|        |           |   |             |                                     | 4 v 6      | 0.9999  |
|        |           |   | 5 v 6       | 0.2695                              |            |         |

| Figure | Condition | Genotype                  | Sample Size | Statistical Test  | P-value |
|--------|-----------|---------------------------|-------------|-------------------|---------|
| 3f     | ABX       | Wt (w+)                   | 12          | Mann-Whitney test | 0.0002  |
|        | Xi*       |                           | 17          |                   |         |
|        | ABX       | <i>Tdc<sup>R023</sup></i> | 19          | Mann-Whitney test | 0.4517  |
|        | Xi*       |                           | 17          |                   |         |
| 3g     | ABX       | Wt (CS)                   | 15          | Mann-Whitney test | 0.0128  |
|        | Xi*       |                           | 15          |                   |         |
|        | ABX       | <i>Tβh<sup>M18</sup></i>  | 11          | Mann-Whitney test | 0.5254  |
|        | Xi*       |                           | 12          |                   |         |

### **Extended Data Figure 1a – h**

Analysis – (1a): Colony forming units. (1b – e, h): Average speed. (1f): Average speed calculated only within walking bouts. (1g): Tripod index: see ref. 64 for calculations.

All are biological replicates assessed with a two-tailed test.

| Figure | Condition  | Sample Size | Statistical Test          | P-value |
|--------|------------|-------------|---------------------------|---------|
| 1a     | <i>L.p</i> | 15          | Unpaired Student's T-test | 0.6800  |
|        | <i>L.b</i> | 18          |                           |         |

| Figure | Condition  | Sex | # | Sample Size | Statistical Test                    | Comparison | P-value  |
|--------|------------|-----|---|-------------|-------------------------------------|------------|----------|
| 1b     | Conv       | F   | 1 | 90          | Kruskal-Wallis test<br>(P < 0.0001) | 1 v 2      | < 0.0001 |
|        | Ax         | F   | 2 | 92          |                                     | 1 v 3      | 0.0251   |
|        | <i>L.b</i> | F   | 3 | 89          |                                     | 2 v 3      | < 0.0001 |
|        | Conv       | M   | 4 | 100         | Kruskal-Wallis test<br>(P = 0.0302) | 4 v 5      | 0.0669   |
|        | Ax         | M   | 5 | 100         |                                     | 4 v 6      | 0.9999   |
|        | <i>L.b</i> | M   | 6 | 95          |                                     | 5 v 5      | 0.0664   |

| Figure | Condition         | # | Sample Size | Statistical Test                    | Comparison | P-value  |
|--------|-------------------|---|-------------|-------------------------------------|------------|----------|
| 1c     | Ax                | 1 | 58          | Kruskal-Wallis test<br>(P < 0.0001) | 1 v 2      | 0.0008   |
|        | <i>L.b</i> EW     | 2 | 57          |                                     | 1 v 3      | < 0.0001 |
|        | <i>L.b</i> Bb14   | 3 | 57          |                                     | 2 v 3      | 0.9999   |
| 1d     | Ax                | 1 | 45          | Kruskal-Wallis test<br>(P < 0.0001) | 1 v 2      | 0.0463   |
|        | <i>L.b</i> EW     | 2 | 28          |                                     | 1 v 3      | < 0.0001 |
|        | <i>L.b</i> P-2    | 3 | 42          |                                     | 2 v 3      | 0.0348   |
| 1e     | Diet 1 Ax         | 1 | 20          | Mann-Whitney test                   | 1 v 2      | 0.0006   |
|        | Diet 1 <i>L.b</i> | 2 | 21          |                                     |            |          |
|        | Diet 2 Ax         | 3 | 18          | Mann-Whitney test                   | 3 v 4      | 0.0004   |
|        | Diet 2 <i>L.b</i> | 4 | 16          |                                     |            |          |
|        | Diet 3 Ax         | 5 | 6           | Mann-Whitney test                   | 5 v 6      | 0.0411   |
|        | Diet 3 <i>L.b</i> | 6 | 6           |                                     |            |          |
| 1f     | Conv              | 1 | 23          | Kruskal-Wallis test<br>(P = 0.1731) | 1 v 4      | 0.9999   |
|        | Ax                | 2 | 35          |                                     |            |          |
|        | <i>L.p</i>        | 3 | 22          |                                     |            |          |
|        | <i>L.b</i>        | 4 | 22          |                                     |            |          |
| 1g     | Conv              | 1 | 6           | Kruskal-Wallis test<br>(P = 0.1358) | 1 v 4      | 0.9999   |
|        | Ax                | 2 | 7           |                                     |            |          |
|        | <i>L.p</i>        | 3 | 5           |                                     |            |          |
|        | <i>L.b</i>        | 4 | 5           |                                     |            |          |
| 1h     | Ax                | 1 | 18          | Kruskal-Wallis test<br>(P < 0.0001) | 1 v 2      | 0.9999   |
|        | <i>L.p</i>        | 2 | 24          |                                     | 1 v 3      | 0.0090   |
|        | <i>L.b</i>        | 3 | 24          |                                     | 1 v 4      | < 0.0001 |
|        | <i>L.p+L.b</i>    | 4 | 24          |                                     | 2 v 3      | 0.2590   |
|        |                   |   |             |                                     | 2 v 4      | 0.0037   |
|        |                   |   | 4 v 5       | 0.9631                              |            |          |

### **Extended Data Figure 2b – 1**

Analysis – (2b, e – g, i): Average speed. (2c, j): Average bout length. (2d, k): Average speed within walking bouts. (2l): Daily crossings.

All are biological replicates assessed with a two-tailed test.

| Figure | Condition       | # | Sample Size | Statistical Test                    | Comparison | P-value |
|--------|-----------------|---|-------------|-------------------------------------|------------|---------|
| 2b     | Ax              | 1 | 46          | Kruskal-Wallis test<br>(P = 0.0015) | 1 v 2      | 0.0032  |
|        | <i>L.b</i> 0d   | 2 | 47          |                                     | 1 v 3      | 0.0096  |
|        | <i>L.b</i> 3-5d | 3 | 43          |                                     | 2 v 3      | 0.9999  |
| 2c     | Ax              | 1 | 18          | Kruskal-Wallis test<br>(P = 0.0041) | 1 v 2      | 0.0295  |
|        | <i>L.b</i> 0d   | 2 | 18          |                                     | 1 v 3      | 0.0126  |
|        | <i>L.b</i> 3-5d | 3 | 6           |                                     | 2 v 3      | 0.8985  |
| 2d     | Ax              | 1 | 36          | Kruskal-Wallis test<br>(P = 0.0004) | 1 v 2      | 0.0063  |
|        | <i>L.b</i> 0d   | 2 | 36          |                                     | 1 v 3      | 0.0019  |
|        | <i>L.b</i> 3-5d | 3 | 12          |                                     | 2 v 3      | 0.6410  |

| Figure | Condition       | # | Sample Size | Statistical Test                    | Comparison | P-value |
|--------|-----------------|---|-------------|-------------------------------------|------------|---------|
| 2e     | Conv            | 1 | 11          | Kruskal-Wallis test<br>(P = 0.0004) | 1 v 2      | 0.0127  |
|        | Ax              | 2 | 53          |                                     | 1 v 3      | 0.9999  |
|        | <i>L.b</i> 0d   | 3 | 53          |                                     | 1 v 4      | 0.9999  |
|        | <i>L.b</i> 3-5d | 4 | 52          |                                     | 2 v 3      | 0.0065  |
|        |                 |   |             |                                     | 2 v 4      | 0.0056  |
|        |                 |   | 3 v 4       | 0.9999                              |            |         |
| 2f     | Conv            | 1 | 32          | Kruskal-Wallis test<br>(P = 0.0038) | 1 v 2      | 0.0122  |
|        | Ax              | 2 | 36          |                                     | 1 v 3      | 0.0091  |
|        | ABX             | 3 | 36          |                                     | 2 v 3      | 0.9999  |
| 2g     | Conv (OR)       | 1 | 20          | Mann-Whitney test                   | 1 v 2      | 0.0265  |
|        | ABX (OR)        | 2 | 22          |                                     |            |         |
|        | Conv (CS)       | 3 | 12          | Mann-Whitney test                   | 3 v 4      | 0.0093  |
|        | ABX (CS)        | 4 | 17          |                                     |            |         |
| 2i     | ABX             | 1 | 29          | Kruskal-Wallis test<br>(P = 0.0011) | 1 v 2      | 0.9999  |
|        | <i>L.p</i>      | 2 | 24          |                                     | 1 v 3      | 0.0203  |
|        | <i>L.b</i>      | 3 | 35          |                                     | 2 v 3      | 0.0019  |
| 2j     | ABX             | 1 | 36          | Kruskal-Wallis test<br>(P = 0.0203) | 1 v 2      | 0.9999  |
|        | <i>L.p</i>      | 2 | 30          |                                     | 1 v 3      | 0.0698  |
|        | <i>L.b</i>      | 3 | 35          |                                     | 2 v 3      | 0.0350  |
| 2k     | ABX             | 1 | 42          | Kruskal-Wallis test<br>(P = 0.0079) | 1 v 2      | 0.9999  |
|        | <i>L.p</i>      | 2 | 30          |                                     | 1 v 3      | 0.0607  |
|        | <i>L.b</i>      | 3 | 35          |                                     | 2 v 3      | 0.0094  |
| 2l     | ABX             | 1 | 6           | Kruskal-Wallis test<br>(P = 0.0109) | 1 v 2      | 0.8385  |
|        | <i>L.p</i>      | 2 | 6           |                                     | 1 v 3      | 0.0148  |
|        | <i>L.b</i>      | 3 | 6           |                                     | 2 v 3      | 0.2507  |

### **Extended Data Figure 3a – f**

Analysis – (3a, b, f): Average speed. (3c): Average bout length. (3d): Average speed within walking bouts.

(3e): Daily crossings.

All are biological replicates assessed with a two-tailed test.

| Figure | Condition      | # | Sample Size | Statistical Test                    | Comparison | P-value  |
|--------|----------------|---|-------------|-------------------------------------|------------|----------|
| 3a     | Ax             | 1 | 45          | Kruskal-Wallis test<br>(P = 0.01)   | 1 v 2      | 0.9999   |
|        | <i>L.p</i>     | 2 | 17          |                                     | 1 v 3      | 0.3301   |
|        | <i>L.b</i>     | 3 | 42          |                                     | 1 v 4      | 0.9999   |
|        | <i>L.p</i> CFS | 4 | 17          |                                     | 1 v 5      | 0.0445   |
|        | <i>L.b</i> CFS | 5 | 16          |                                     | 3 v 5      | 0.9999   |
| 4 v 5  |                |   |             | 0.0906                              |            |          |
| 3b     | Ax             | 1 | 23          | Kruskal-Wallis test<br>(P < 0.0001) | 1 v 2      | 0.1287   |
|        | <i>L.p</i> CFS | 2 | 20          |                                     | 1 v 3      | < 0.0001 |
|        | <i>L.b</i> CFS | 3 | 20          |                                     | 2 v 3      | 0.0025   |

| Figure | Condition      | # | Sample Size | Statistical Test                    | Comparison | P-value  |
|--------|----------------|---|-------------|-------------------------------------|------------|----------|
| 3c     | Ax             | 1 | 23          | Kruskal-Wallis test<br>(P = 0.0016) | 1 v 2      | 0.5833   |
|        | <i>L.p</i> CFS | 2 | 20          |                                     | 1 v 3      | 0.0010   |
|        | <i>L.b</i> CFS | 3 | 17          |                                     | 2 v 3      | 0.0696   |
| 3d     | Ax             | 1 | 22          | Kruskal-Wallis test<br>(P < 0.0001) | 1 v 2      | 0.0231   |
|        | <i>L.p</i> CFS | 2 | 21          |                                     | 1 v 3      | < 0.0001 |
|        | <i>L.b</i> CFS | 3 | 17          |                                     | 2 v 3      | 0.0493   |
| 3e     | Ax             | 1 | 8           | Kruskal-Wallis test<br>(P = 0.0469) | 1 v 2      | 0.9999   |
|        | <i>L.p</i> CFS | 2 | 8           |                                     | 1 v 3      | 0.2535   |
|        | <i>L.b</i> CFS | 3 | 4           |                                     | 2 v 3      | 0.0472   |
| 3f     | Ax             | 1 | 96          | Kruskal-Wallis test<br>(P = 0.0009) | 1 v 2      | 0.0004   |
|        | <i>L.b</i>     | 2 | 88          |                                     | 1 v 3      | 0.9999   |
|        | 0.1 Uracil     | 3 | 41          |                                     | 1 v 4      | 0.4509   |
|        | 10 Uracil      | 4 | 18          |                                     |            |          |

### Extended Data Figure 4a – e

Analysis – (4a, b): Average speed. (4c): Expression of gene transcripts, samples from whole body homogenates.

(4d): Amount ingested. (4e): Gut content.

All are biological replicates assessed with a two-tailed test.

| Figure | Condition      | Measurement | #  | Sample Size | Statistical Test                   | Comparison | P-value  |
|--------|----------------|-------------|----|-------------|------------------------------------|------------|----------|
| 4a     | Wt Conv        |             | 1  | 16          | Mann-Whitney test                  | 1 v 2      | 0.0032   |
|        | Wt ABX         |             | 2  | 17          |                                    |            |          |
|        | IMD Conv       |             | 3  | 24          | Mann-Whitney test                  | 3 v 4      | 0.0168   |
|        | IMD ABX        |             | 4  | 25          |                                    |            |          |
| 4b     | Wt Conv        |             | 1  | 15          | Mann-Whitney test                  | 1 v 2      | 0.0299   |
|        | Wt ABX         |             | 2  | 17          |                                    |            |          |
|        | Ti Conv        |             | 3  | 10          | Mann-Whitney test                  | 3 v 4      | < 0.0001 |
|        | Ti ABX         |             | 4  | 11          |                                    |            |          |
| 4c     | Ax             | <i>Dpt</i>  | 1  | 8           | One-way ANOVA test<br>(P = 0.8386) |            |          |
|        | <i>L.p</i> CFS |             | 2  | 10          |                                    |            |          |
|        | <i>L.b</i> CFS |             | 3  | 10          |                                    |            |          |
|        | Ax             | <i>Drs</i>  | 4  | 10          | One-way ANOVA test<br>(P = 0.9441) |            |          |
|        | <i>L.p</i> CFS |             | 5  | 10          |                                    |            |          |
|        | <i>L.b</i> CFS |             | 6  | 10          |                                    |            |          |
|        | Ax             | <i>Cec</i>  | 7  | 8           | One-way ANOVA test<br>(P = 0.5100) |            |          |
|        | <i>L.p</i> CFS |             | 8  | 10          |                                    |            |          |
|        | <i>L.b</i> CFS |             | 9  | 10          |                                    |            |          |
|        | Ax             | <i>AttA</i> | 10 | 5           | One-way ANOVA test<br>(P = 0.4687) |            |          |
|        | <i>L.p</i> CFS |             | 11 | 5           |                                    |            |          |
|        | <i>L.b</i> CFS |             | 12 | 5           |                                    |            |          |
|        | Ax             | <i>Duox</i> | 13 | 3           | One-way ANOVA test<br>(P = 0.6952) |            |          |
|        | <i>L.p</i> CFS |             | 14 | 5           |                                    |            |          |
|        | <i>L.b</i> CFS |             | 15 | 5           |                                    |            |          |

| Figure | Condition      | # | Sample Size | Statistical Test                    | Comparison | P-value |
|--------|----------------|---|-------------|-------------------------------------|------------|---------|
| 4d     | Ax             | 1 | 6           | Kruskal-Wallis test<br>(P = 0.8626) |            |         |
|        | <i>L.p</i> CFS | 2 | 5           |                                     |            |         |
|        | <i>L.b</i> CFS | 3 | 5           |                                     |            |         |
| 4e     | Conv           | 1 | 7           | Kruskal-Wallis test<br>(P = 0.4236) |            |         |
|        | Ax             | 2 | 13          |                                     |            |         |
|        | <i>L.p</i> CFS | 3 | 7           |                                     |            |         |
|        | <i>L.b</i> CFS | 4 | 10          |                                     |            |         |

### **Extended Data Figure 5a – j**

Analysis – (5a – f, h): Average speed. (5g): Daily crossings. (5i): Percent survival. Each sample consists of 15 – 25 flies. (5j): Percentage of apoptotic cells.

All are biological replicates assessed with a two-tailed test.

| Figure | Condition      | # | Sample Size | Statistical Test                    | Comparison | P-value  |
|--------|----------------|---|-------------|-------------------------------------|------------|----------|
| 5a     | Ax             | 1 | 18          | Kruskal-Wallis test<br>(P = 0.0008) | 1 v 2      | 0.0566   |
|        | <i>L.b</i> CFS | 2 | 18          |                                     | 1 v 3      | 0.9999   |
|        | + Typ          | 3 | 17          |                                     | 1 v 4      | 0.0021   |
|        | - Typ          | 4 | 17          |                                     | 3 v 4      | 0.0181   |
| 5b     | Ax             | 1 | 23          | Kruskal-Wallis test<br>(P = 0.0037) | 1 v 2      | 0.0081   |
|        | <i>L.b</i> CFS | 2 | 18          |                                     | 1 v 3      | 0.5168   |
|        | +PK            | 3 | 23          |                                     | 1 v 4      | 0.0139   |
|        | -PK            | 4 | 23          |                                     | 3 v 4      | 0.9999   |
| 5c     | Ax             | 1 | 18          | Kruskal-Wallis test<br>(P = 0.0102) | 1 v 2      | 0.0081   |
|        | <i>L.b</i> CFS | 2 | 18          |                                     | 1 v 3      | 0.1867   |
|        | +100°C         | 3 | 18          |                                     | 2 v 3      | 0.7709   |
| 5d     | Ax             | 1 | 30          | Kruskal-Wallis test<br>(P = 0.0016) | 1 v 2      | 0.0170   |
|        | +amyl          | 2 | 17          |                                     | 1 v 3      | 0.0036   |
|        | -amyl          | 3 | 30          |                                     | 2 v 3      | 0.9999   |
| 5e     | Ax             | 1 | 30          | Kruskal-Wallis test<br>(P < 0.0001) | 1 v 2      | < 0.0001 |
|        | <i>L.b</i>     | 2 | 30          |                                     | 1 v 3      | 0.2185   |
|        | <i>L.p</i>     | 3 | 29          |                                     | 1 v 4      | 0.9140   |
|        | <i>A.p</i>     | 4 | 30          |                                     | 1 v 5      | < 0.0001 |
|        | <i>E.c</i>     | 5 | 18          |                                     | 2 v 3      | 0.0074   |
| 5f     | Ax             | 1 | 65          | Kruskal-Wallis test<br>(P < 0.0001) | 1 v 2      | 0.0183   |
|        | <i>E.c</i>     | 2 | 52          |                                     | 1 v 3      | 0.0003   |
|        | $\Delta tyrA$  | 3 | 18          |                                     | 1 v 4      | 0.0300   |
|        | $\Delta trpC$  | 4 | 17          |                                     | 1 v 5      | < 0.0001 |
|        | $\Delta manX$  | 5 | 45          |                                     | 1 v 6      | < 0.0001 |
|        | $\Delta treA$  | 6 | 46          |                                     | 1 v 7      | 0.9999   |
|        | $\Delta xylA$  | 7 | 20          |                                     |            |          |



| Figure | Condition         | # | Sample Size | Statistical Test                    | Comparison | P-value |
|--------|-------------------|---|-------------|-------------------------------------|------------|---------|
| 5g     | Conv              | 1 | 16          | Kruskal-Wallis test<br>(P = 0.0027) | 1 v 2      | 0.0432  |
|        | Ax                | 2 | 24          |                                     | 2 v 3      | 0.0640  |
|        | <i>L.b</i> CFS    | 3 | 19          |                                     | 2 v 4      | 0.9999  |
|        | $\Delta xylA$ CFS | 4 | 20          |                                     | 2 v 5      | 0.0134  |
|        | Xi                | 5 | 8           |                                     |            |         |
| 5h     | Ax                | 1 | 16          | Kruskal-Wallis test<br>(P = 0.0167) | 1 v 2      | 0.0274  |
|        | <i>L.p</i> CFS    | 2 | 11          |                                     | 1 v 3      | 0.9999  |
|        | 10 Xi             | 3 | 12          |                                     | 1 v 4      | 0.0263  |
|        | 100 Xi            | 4 | 14          |                                     |            |         |
| 5i     | Ax                | 1 | 4           | Kruskal-Wallis test<br>(P = 0.4117) |            |         |
|        | <i>L.p</i> CFS    | 2 | 5           |                                     |            |         |
|        | <i>L.b</i> CFS    | 3 | 5           |                                     |            |         |
|        | Xi                | 4 | 4           |                                     |            |         |
| 5j     | Conv              | 1 | 7           | Kruskal-Wallis test<br>(P = 0.0383) | 1 v 2      | 0.9999  |
|        | Ax                | 2 | 5           |                                     | 2 v 3      | 0.9999  |
|        | <i>L.p</i> CFS    | 3 | 4           |                                     | 2 v 4      | 0.0343  |
|        | <i>L.b</i> CFS    | 4 | 6           |                                     | 2 v 5      | 0.9999  |
|        | Xi                | 5 | 6           |                                     |            |         |

### **Extended Data Figure 6a – b**

Analysis – (6a, b): Sleep analysis.

All are biological replicates assessed with a two-tailed test.

| Figure               | Condition      | # | Sample Size | Statistical Test                    | Comparison | P-value |
|----------------------|----------------|---|-------------|-------------------------------------|------------|---------|
| 6a<br>Light<br>Phase | Conv           | 1 | 8           | Kruskal-Wallis test<br>(P = 0.0036) | 1 v 2      | 0.0193  |
|                      | Ax             | 2 | 8           |                                     | 2 v 3      | 0.9999  |
|                      | <i>L.p</i>     | 3 | 8           |                                     | 2 v 4      | 0.0193  |
|                      | <i>L.b</i>     | 4 | 8           |                                     |            |         |
| 6a<br>Dark<br>Phase  | Conv           | 1 | 8           | Kruskal-Wallis test<br>(P = 0.0585) |            |         |
|                      | Ax             | 2 | 8           |                                     |            |         |
|                      | <i>L.p</i>     | 3 | 8           |                                     |            |         |
|                      | <i>L.b</i>     | 4 | 8           |                                     |            |         |
| 6b<br>Light<br>Phase | Conv           | 1 | 17          | Kruskal-Wallis test<br>(P = 0.0314) | 1 v 2      | 0.0911  |
|                      | Ax             | 2 | 25          |                                     | 2 v 3      | 0.4850  |
|                      | <i>L.p</i> CFS | 3 | 19          |                                     | 2 v 4      | 0.9999  |
|                      | <i>L.b</i> CFS | 4 | 21          |                                     | 2 v 5      | 0.0932  |
|                      | Xi             | 5 | 8           |                                     |            |         |
| 6b<br>Dark<br>Phase  | Conv           | 1 | 17          | Kruskal-Wallis test<br>(P = 0.1477) |            |         |
|                      | Ax             | 2 | 25          |                                     |            |         |
|                      | <i>L.p</i> CFS | 3 | 19          |                                     |            |         |
|                      | <i>L.b</i> CFS | 4 | 21          |                                     |            |         |
|                      | Xi             | 5 | 8           |                                     |            |         |

**Extended Data Figure 7a – k**

Analysis – (7a – c, h – k): Average speed. (7d – e): Carbohydrate analysis measured using HPAEC-PAD. (7f – g): Trehalose levels in whole fly homogenate measured using a Megazyme Kit. All are biological replicates assessed with a two-tailed test.

| Figure | Condition  | Measurement | #  | Sample Size | Statistical Test | Comparison | P-value |
|--------|------------|-------------|----|-------------|------------------|------------|---------|
| 7a     | Ax         |             | 1  | 16          | Kruskal-         | 1 v 2      | 0.0021  |
|        | Xi         |             | 2  | 13          | Wallis test      | 1 v 3      | 0.1866  |
|        | +Fruc      |             | 3  | 13          | (P = 0.0041)     | 1 v 4      | 0.1992  |
|        | +Gluc      |             | 4  | 15          |                  |            |         |
| 7b     | Ax         |             | 1  | 26          | Kruskal-         | 1 v 2      | 0.0026  |
|        | Xi         |             | 2  | 21          | Wallis test      | 1 v 3      | 0.3686  |
|        | +Xylose    |             | 3  | 22          | (P = 0.0048)     | 1 v 4      | 0.1780  |
|        | +Xylulose  |             | 4  | 18          |                  |            |         |
| 7c     | Ax         |             | 1  | 21          | Kruskal-         | 1 v 2      | 0.0003  |
|        | Xi         |             | 2  | 16          | Wallis test      | 1 v 3      | 0.2565  |
|        | Xi+EDTA    |             | 3  | 18          | (P = 0.0005)     | 2 v 3      | 0.0959  |
| 7d     | Ax         | Gluc        | 1  | 3           | Mann-            | 1 v 2      | 0.1000  |
|        | Xi         |             | 2  | 3           | Whitney test     |            |         |
|        | Ax         | Fruc        | 3  | 3           | Mann-            | 3 v 4      | 0.4000  |
|        | Xi         |             | 4  | 3           | Whitney test     |            |         |
|        | Ax         | Mann        | 5  | 3           | Mann-            | 5 v 6      | 0.7000  |
|        | Xi         |             | 6  | 3           | Whitney test     |            |         |
|        | Ax         | Xylu        | 7  | 3           | Mann-            | 7 v 8      | 0.4000  |
|        | Xi         |             | 8  | 3           | Whitney test     |            |         |
|        | Ax         | Treh        | 9  | 3           | Mann-            | 9 v 10     | 0.1000  |
|        | Xi         |             | 10 | 3           | Whitney test     |            |         |
| 7e     | Ax         | Ribo        | 1  | 5           | Kruskal-         | 1 v 2      | 0.0908  |
|        | Xi         |             | 2  | 5           | Wallis test      | 1 v 3      | 0.0047  |
|        | Xi+EDTA    |             | 3  | 5           | (P = 0.0004)     | 2 v 3      | 0.9601  |
|        | Ax         | Treh        | 4  | 5           | Kruskal-         | 4 v 5      | 0.0027  |
|        | Xi         |             | 5  | 5           | Wallis test      | 4 v 6      | 0.1431  |
|        | Xi+EDTA    |             | 6  | 5           | (P = 0.0001)     | 5 v 6      | 0.5373  |
| 7f     | Conv       | Treh        | 1  | 9           | Kruskal-         | 1 v 2      | 0.0161  |
|        | Ax         |             | 2  | 6           | Wallis test      | 1 v 3      | 0.9999  |
|        | Xi         |             | 3  | 3           | (P = 0.0083)     |            |         |
| 7g     | Ax         | Treh        | 1  | 15          | Mann-            | 1 v 2      | 0.0059  |
|        | <i>L.b</i> |             | 2  | 15          | Whitney test     |            |         |
| 7h     | Ax         |             | 1  | 40          | Kruskal-         | 1 v 2      | 0.0284  |
|        | Xi         |             | 2  | 40          | Wallis test      | 1 v 3      | 0.9999  |
|        | Xi+Treh    |             | 3  | 39          | (P = 0.0004)     | 1 v 4      | 0.0825  |
|        | Xi+Ara     |             | 4  | 18          |                  | 2 v 3      | 0.0028  |
|        |            |             |    |             | 3 v 4            | 0.0160     |         |

| Figure | Condition    | # | Sample Size | Statistical Test                    | Comparison | P-value |
|--------|--------------|---|-------------|-------------------------------------|------------|---------|
| 7i     | Ax           | 1 | 29          | Kruskal-Wallis test<br>(P = 0.0286) | 1 v 2      | 0.0350  |
|        | Xi           | 2 | 25          |                                     | 1 v 3      | 0.9999  |
|        | +Ribo        | 3 | 12          |                                     |            |         |
| 7j     | Conv         | 1 | 15          | Kruskal-Wallis test<br>(P = 0.0045) | 1 v 2      | 0.0022  |
|        | Ax           | 2 | 22          |                                     | 1 v 3      | 0.0914  |
|        | Conv+Treh    | 3 | 18          |                                     | 3 v 4      | 0.9999  |
|        | Ax+Treh      | 4 | 15          |                                     |            |         |
| 7k     | Ax           | 1 | 27          | Kruskal-Wallis test<br>(P = 0.0499) | 1 v 2      | 0.0361  |
|        | Xi           | 2 | 19          |                                     | 1 v 3      | 0.8516  |
|        | Xi+EDTA      | 3 | 24          |                                     | 1 v 4      | 0.9999  |
|        | Xi+Treh      | 4 | 19          |                                     | 1 v 5      | 0.9999  |
|        | Xi+EDTA+Treh | 5 | 25          |                                     |            |         |

### **Extended Data Figure 8b – h**

Analysis – (8b – h): Average speed.

All are biological replicates assessed with a two-tailed test.

| Figure         | Condition          | Genotype           | Sample Size       | Statistical Test  | P-value |
|----------------|--------------------|--------------------|-------------------|-------------------|---------|
| 8b             | ABX                | <i>UAS-TrpA1</i>   | 15                | Mann-Whitney test | 0.0027  |
|                | <i>L.b</i> CFS     |                    | 14                |                   |         |
|                | ABX                | <i>pBDPG4U-</i>    | 24                | Mann-Whitney test | 0.0127  |
|                | <i>L.b</i> CFS     | <i>GAL4</i>        | 20                |                   |         |
|                | ABX                | <i>GAL4&gt;UAS</i> | 14                | Mann-Whitney test | 0.0456  |
|                | <i>L.b</i> CFS     | (27°C)             | 9                 |                   |         |
| ABX            | <i>GAL4&gt;UAS</i> | 16                 | Mann-Whitney test | 0.0390            |         |
| <i>L.b</i> CFS | (20°C)             | 11                 |                   |                   |         |
| 8c             | ABX                | <i>UAS-TrpA1</i>   | 24                | Mann-Whitney test | 0.0008  |
|                | <i>L.b</i> CFS     |                    | 24                |                   |         |
|                | ABX                | <i>Tdc2-GAL4</i>   | 24                | Mann-Whitney test | 0.0252  |
|                | <i>L.b</i> CFS     |                    | 23                |                   |         |
|                | ABX                | <i>GAL4&gt;UAS</i> | 25                | Mann-Whitney test | 0.4265  |
|                | <i>L.b</i> CFS     | (27°C)             | 26                |                   |         |
| ABX            | <i>GAL4&gt;UAS</i> | 19                 | Mann-Whitney test | 0.0233            |         |
| <i>L.b</i> CFS | (20°C)             | 19                 |                   |                   |         |
| 8d             | ABX                | <i>UAS-TrpA1</i>   | 26                | Mann-Whitney test | 0.0012  |
|                | <i>L.b</i> CFS     |                    | 18                |                   |         |
|                | ABX                | <i>Tβh-GAL4</i>    | 36                | Mann-Whitney test | 0.0003  |
|                | <i>L.b</i> CFS     |                    | 24                |                   |         |
|                | ABX                | <i>GAL4&gt;UAS</i> | 53                | Mann-Whitney test | 0.5668  |
|                | <i>L.b</i> CFS     | (27°C)             | 23                |                   |         |
| ABX            | <i>GAL4&gt;UAS</i> | 21                 | Mann-Whitney test | 0.0006            |         |
| <i>L.b</i> CFS | (20°C)             | 7                  |                   |                   |         |

| Figure         | Condition          | Genotype           | Sample Size  | Statistical Test | P-value  |
|----------------|--------------------|--------------------|--------------|------------------|----------|
| 8e             | ABX                | <i>UAS-TrpA1</i>   | 34           | Mann-            | 0.0089   |
|                | <i>L.b</i> CFS     |                    | 26           | Whitney test     |          |
|                | ABX                | <i>Ddc-GAL4</i>    | 34           | Mann-            | 0.0157   |
|                | <i>L.b</i> CFS     |                    | 28           | Whitney test     |          |
|                | ABX                | <i>GAL4&gt;UAS</i> | 10           | Mann-            | < 0.0001 |
|                | <i>L.b</i> CFS     | (27°C)             | 17           | Whitney test     |          |
| ABX            | <i>GAL4&gt;UAS</i> | 17                 | Mann-        | 0.0004           |          |
| <i>L.b</i> CFS | (20°C)             | 13                 | Whitney test |                  |          |
| 8f             | ABX                | <i>UAS-TrpA1</i>   | 36           | Mann-            | 0.0016   |
|                | <i>L.b</i> CFS     |                    | 30           | Whitney test     |          |
|                | ABX                | <i>Th-GAL4</i>     | 40           | Mann-            | 0.0041   |
|                | <i>L.b</i> CFS     |                    | 31           | Whitney test     |          |
|                | ABX                | <i>GAL4&gt;UAS</i> | 19           | Mann-            | < 0.0001 |
|                | <i>L.b</i> CFS     | (27°C)             | 17           | Whitney test     |          |
| ABX            | <i>GAL4&gt;UAS</i> | 14                 | Mann-        | 0.0103           |          |
| <i>L.b</i> CFS | (20°C)             | 8                  | Whitney test |                  |          |
| 8g             | ABX                | <i>UAS-TrpA1</i>   | 21           | Mann-            | 0.0330   |
|                | <i>L.b</i> CFS     |                    | 12           | Whitney test     |          |
|                | ABX                | <i>Gad1-GAL4</i>   | 28           | Mann-            | 0.0120   |
|                | <i>L.b</i> CFS     |                    | 24           | Whitney test     |          |
|                | ABX                | <i>GAL4&gt;UAS</i> | 24           | Mann-            | 0.0001   |
|                | <i>L.b</i> CFS     | (27°C)             | 20           | Whitney test     |          |
| ABX            | <i>GAL4&gt;UAS</i> | 16                 | Mann-        | 0.0135           |          |
| <i>L.b</i> CFS | (20°C)             | 15                 | Whitney test |                  |          |
| 8h             | ABX                | <i>UAS-TrpA1</i>   | 31           | Mann-            | 0.0153   |
|                | <i>L.b</i> CFS     |                    | 20           | Whitney test     |          |
|                | ABX                | <i>ChAT-GAL4</i>   | 31           | Mann-            | 0.0179   |
|                | <i>L.b</i> CFS     |                    | 29           | Whitney test     |          |
|                | ABX                | <i>GAL4&gt;UAS</i> | 16           | Mann-            | 0.0207   |
|                | <i>L.b</i> CFS     | (27°C)             | 17           | Whitney test     |          |
| ABX            | <i>GAL4&gt;UAS</i> | 18                 | Mann-        | < 0.0001         |          |
| <i>L.b</i> CFS | (20°C)             | 14                 | Whitney test |                  |          |

**Extended Data Figure 9**

Analysis – Average speed.

All are biological replicates assessed with a two-tailed test.

| Figure | Condition      | Genotype                        | Sample Size | Statistical Test  | P-value |
|--------|----------------|---------------------------------|-------------|-------------------|---------|
| 9      | ABX            | <i>UAS-TrpA1</i>                | 15          | Mann-Whitney test | 0.3314  |
|        | <i>L.b</i> CFS | <i>Tβh<sup>M18</sup></i>        | 14          |                   |         |
|        | ABX            | <i>Tβh-GAL4</i>                 | 28          | Mann-Whitney test | 0.2235  |
|        | <i>L.b</i> CFS | <i>Tβh<sup>M18</sup></i>        | 20          |                   |         |
|        | ABX            | <i>GAL4&gt;UAS</i>              | 11          | Mann-Whitney test | 0.2284  |
|        | <i>L.b</i> CFS | <i>Tβh<sup>M18</sup> (27°C)</i> | 13          |                   |         |
|        | ABX            | <i>GAL4&gt;UAS</i>              | 9           | Mann-Whitney test | 0.0745  |
|        | <i>L.b</i> CFS | <i>Tβh<sup>M18</sup> (20°C)</i> | 8           |                   |         |

**Extended Data Figure 10a – k**

Analysis – (10a, d, e, f, h – k): Average speed. (10b – c): Expression of gene transcripts, samples from head homogenates.

All are biological replicates assessed with a two-tailed test.

| Figure | Condition             | Measurement | # | Sample Size | Statistical Test                    | Comparison | P-value |
|--------|-----------------------|-------------|---|-------------|-------------------------------------|------------|---------|
| 10a    | Ax                    |             | 1 | 26          | Kruskal-Wallis test<br>(P = 0.0004) | 1 v 2      | 0.9999  |
|        | Ax+OA                 |             | 2 | 27          |                                     | 1 v 3      | 0.9999  |
|        | Ax+L-dopa             |             | 3 | 6           |                                     | 1 v 4      | 0.0012  |
|        | <i>L.b</i> CFS        |             | 4 | 35          |                                     | 1 v 5      | 0.9965  |
|        | <i>L.b</i> CFS+OA     |             | 5 | 26          |                                     | 1 v 6      | 0.0405  |
|        | <i>L.b</i> CFS+L-dopa |             | 6 | 6           |                                     |            |         |
| 10b    | Ax                    | <i>Tdc</i>  | 1 | 5           | Unpaired t-test                     | 1 v 2      | 0.0754  |
|        | <i>L.b</i> CFS        |             | 2 | 5           |                                     |            |         |
|        | Ax                    | <i>Tβh</i>  | 3 | 5           | Unpaired t-test                     | 3 v 4      | 0.0426  |
|        | <i>L.b</i> CFS        |             | 4 | 5           |                                     |            |         |
|        | Ax                    | <i>Ddc</i>  | 5 | 3           | Unpaired t-test                     | 5 v 6      | 0.6179  |
|        | <i>L.b</i> CFS        |             | 6 | 5           |                                     |            |         |
|        | Ax                    | <i>Tph</i>  | 7 | 7           | Unpaired t-test                     | 7 v 8      | 0.8425  |
|        | <i>L.b</i> CFS        |             | 8 | 7           |                                     |            |         |
| 10c    | Ax                    | <i>Tdc</i>  | 1 | 5           | Unpaired t-test                     | 1 v 2      | 0.0122  |
|        | Xi                    |             | 2 | 6           |                                     |            |         |
|        | Ax                    | <i>Tβh</i>  | 3 | 5           | Unpaired t-test                     | 3 v 4      | 0.0036  |
|        | Xi                    |             | 4 | 6           |                                     |            |         |
| 10d    | Ax                    |             | 1 | 21          | Kruskal-Wallis test<br>(P < 0.0001) | 1 v 2      | 0.9999  |
|        | Ax+TA                 |             | 2 | 10          |                                     | 1 v 3      | 0.0030  |
|        | <i>L.b</i> CFS        |             | 3 | 10          |                                     | 1 v 4      | 0.0019  |
|        | <i>L.b</i> CFS+TA     |             | 4 | 9           |                                     | 2 v 4      | 0.0296  |

| Figure | Condition      | Genotype                  | # | Sample Size | Statistical Test                    | Comparison | P-value |
|--------|----------------|---------------------------|---|-------------|-------------------------------------|------------|---------|
| 10e    | Ax             | <i>Tdc2-GAL4;</i>         | 1 | 25          | Mann-Whitney test                   | 1 v 2      | 0.0216  |
|        | Xi             | <i>Tsh-GAL80</i>          | 2 | 18          |                                     |            |         |
|        | Ax             | <i>UAS-DTI</i>            | 3 | 26          | Mann-Whitney test                   | 3 v 4      | 0.0151  |
|        | Xi             |                           | 4 | 21          |                                     |            |         |
|        | Ax             | <i>GAL4;GAL80</i>         | 5 | 39          | Mann-Whitney test                   | 5 v 6      | 0.3173  |
|        | Xi             | <i>&gt;UAS</i>            | 6 | 23          |                                     |            |         |
| 10f    | Ax             | <i>UAS-TβhRNAi</i>        | 1 | 9           | Mann-Whitney test                   | 1 v 2      | 0.0106  |
|        | <i>L.b</i> CFS |                           | 2 | 9           |                                     |            |         |
|        | Ax             | <i>Elav-GAL4</i>          | 3 | 24          | Mann-Whitney test                   | 3 v 4      | 0.0040  |
|        | <i>L.b</i> CFS |                           | 4 | 19          |                                     |            |         |
|        | Ax             | <i>GAL4&gt;UAS</i>        | 5 | 24          | Mann-Whitney test                   | 5 v 6      | 0.1703  |
|        | <i>L.b</i> CFS |                           | 6 | 21          |                                     |            |         |
| 10h    | Ax             |                           | 1 | 14          | Kruskal-Wallis test<br>(P = 0.0010) | 1 v 2      | 0.0007  |
|        | Xi             |                           | 2 | 15          |                                     | 1 v 3      | 0.5040  |
|        | Xi+Mianserin   |                           | 3 | 15          |                                     | 2 v 3      | 0.0593  |
| 10i    | Conv           |                           | 1 | 13          | Kruskal-Wallis test<br>(P = 0.0015) | 1 v 2      | 0.0010  |
|        | Ax             |                           | 2 | 28          |                                     | 1 v 3      | 0.9999  |
|        | Xi             |                           | 3 | 24          |                                     | 2 v 3      | 0.0234  |
|        | Conv+Mian      |                           | 4 | 27          |                                     | 4 v 5      | 0.9999  |
|        | Ax+Mian        |                           | 5 | 22          |                                     | 4 v 6      | 0.9999  |
|        | Xi+Mian        |                           | 6 | 22          |                                     | 5 v 6      | 0.9999  |
| 10j    | Conv           | Wt (w+)                   | 1 | 13          | Mann-Whitney test                   | 1 v 2      | 0.0093  |
|        | ABX            |                           | 2 | 21          |                                     |            |         |
|        | Conv           | <i>Tdc<sup>R023</sup></i> | 3 | 28          | Mann-Whitney test                   | 3 v 4      | 0.6889  |
|        | ABX            |                           | 4 | 34          |                                     |            |         |
| 10k    | Conv           | Wt (CS)                   | 1 | 38          | Mann-Whitney test                   | 1 v 2      | 0.0100  |
|        | ABX            |                           | 2 | 42          |                                     |            |         |
|        | Conv           | <i>Tβh<sup>M18</sup></i>  | 3 | 25          | Mann-Whitney test                   | 3 v 4      | 0.7435  |
|        | ABX            |                           | 4 | 33          |                                     |            |         |
